1 **A generalist lifestyle allows rare *Gardnerella* spp. to persist at low levels in the vaginal**  
2 **microbiome**

3  
4 Salahuddin Khan, Sarah J. Vancuren<sup>1</sup> and Janet E. Hill\*

5  
6 Department of Veterinary Microbiology, University of Saskatchewan, Saskatoon, Saskatchewan,  
7 Canada, S7N 5B4

8  
9 <sup>1</sup>Current address: Department of Molecular and Cellular Biology, University of Guelph, Guelph,  
10 ON

11 \*To whom correspondence should be addressed

12 52 Campus Drive

13 Saskatoon, SK. S7N 5B4

14  
15 E-mail:

16 SK: [salahuddin.khan@usask.ca](mailto:salahuddin.khan@usask.ca)

17 SJV: [svancure@uoguelph.ca](mailto:svancure@uoguelph.ca)

18 JEH: [Janet.Hill@usask.ca](mailto:Janet.Hill@usask.ca)

19  
20 ORCID:

21 SK: 0000-0002-6826-9319

22 SJV: 0000-0002-6145-9670

23 JEH: 0000-0002-2187-6277

24 **Abstract**

25 *Gardnerella* spp. are considered a hallmark of bacterial vaginosis, a dysbiosis of the vaginal  
26 microbiome. There are four cpn60 sequence-based subgroups within the genus (A, B, C, and D),  
27 and thirteen genome species have been defined recently. *Gardnerella* spp. co-occur in the  
28 vaginal microbiome with varying abundance, and these patterns are shaped by a resource-  
29 dependent, exploitative competition, which affects the growth rate of subgroup A, B, and C  
30 negatively. The growth rate of rarely abundant subgroup D, however, increases with the  
31 increasing number of competitors, negatively affecting the growth rate of others. We  
32 hypothesized that a nutritional generalist lifestyle and minimal niche overlap with the other,  
33 more abundant *Gardnerella* spp. facilitate the maintenance of subgroup D in the vaginal  
34 microbiome through negative-frequency dependent selection. Using 40 whole genome sequences  
35 from isolates representing all four subgroups we found that they could be distinguished based on  
36 content of their predicted proteomes. Proteins associated with carbohydrate and amino acid  
37 uptake and metabolism were significant contributors to the separation of subgroups. Subgroup D  
38 isolates had significantly more of their proteins assigned to amino acid metabolism than the other  
39 subgroups. Subgroup D isolates were also significantly different from others in terms of number  
40 and type of carbon sources utilized in a phenotypic assay, while the other three could not be  
41 distinguished. Overall, the results suggest that a generalist lifestyle and lack of niche overlap  
42 with other *Gardnerella* spp. leads to subgroup D being favoured by negative-frequency  
43 dependent selection in the vaginal microbiome.

44

45 **Keywords:** *Gardnerella*, vaginal microbiome, negative frequency dependent selection,  
46 pangenome, competition

## 47 **Introduction**

48 *Gardnerella* spp. are an important diagnostic marker of bacterial vaginosis (BV), a dysbiosis of  
49 the vaginal microbiome characterized by a shift from lactobacilli dominated vaginal microbiome  
50 to a more diverse microbiome, containing many aerobic and anaerobic bacterial species,  
51 including *Gardnerella* spp.. *Gardnerella* is a diverse genus and at least four subgroups (A, B, C,  
52 and D) have been identified using cpn60 universal target barcode sequencing [1], which  
53 correspond to four clades defined by Ahmed et al. [2]. Recently, *Gardnerella* subgroups have  
54 been reclassified into thirteen genome species, of which four are now named as *G. vaginalis*  
55 (Subgroup C/Clade 1), *G. swidsinskii* and *G. leopoldii* (Subgroup A/Clade 4), and *G. piovii*  
56 (Subgroup B/Clade 2) [3, 4]. These *Gardnerella* species differ in their phenotypic traits,  
57 including sialidase activity and vaginolysin production, which may render some of the subgroups  
58 more pathogenic than the others [5–7].

59 Women with vaginal microbiomes dominated by *Gardnerella* are usually colonized by at least  
60 two *Gardnerella* spp. [4, 8]. The relative abundances of these co-occurring species, however, are  
61 not equal. Subgroup A (*G. swidsinskii* and *G. leopoldii*) and subgroup C (*G. vaginalis*) are most  
62 frequently dominant in reproductive aged women [4, 8]. These two subgroups are also often  
63 associated with the clinical symptoms of bacterial vaginosis [4, 9, 10]. Subgroup B has been  
64 suggested to be associated with intermediate microbiota [7, 9, 10]. Subgroup D, comprised of  
65 several unnamed "genome species", has only been detected at low prevalence and abundance [4,  
66 10].

67 Several factors can affect the abundance and co-occurrence of *Gardnerella* spp. in the vaginal  
68 microbiome, including host physiology, host-microbiota interactions, nutrient availability and  
69 ecological interactions among bacteria [11, 12]. Ecological interactions are perhaps the most

70 important factors which may affect the co-occurrence and ecological succession of *Gardnerella*  
71 species in the vaginal microbiome. Recently, we demonstrated that an indirect, exploitative  
72 competition between subgroups of *Gardnerella* is prevalent in co-cultures *in vitro*. While the  
73 growth rates of isolates in subgroups A, B, and C, were negatively affected by competition,  
74 growth rates of *Gardnerella* subgroup D isolates increased with the increasing number of  
75 competing subgroups in co-culture communities [12].

76 The strength of microbial interactions between bacterial species can be affected by niche overlap  
77 [13, 14], and species with similar nutritional requirements will naturally compete over the same  
78 resources [15]. In addition to competition for nutritional resources, bacteria may also compete  
79 for resources essential for colonizing a specific site. Since isolates from *Gardnerella* subgroups  
80 A, B and C are negatively affected by competition, and subgroup D isolates experienced a boost  
81 in growth rate, the degree of niche overlap between subgroup A, B, and C is presumably higher  
82 than between subgroup D and any of the others.

83 Although the growth rate of subgroup D increases in co-cultures, it does not have an intrinsically  
84 high growth rate. In fact, the *in vitro* growth rate of subgroup D is half of that of subgroup C,  
85 which may contribute to its low abundance in the vaginal microbiome [12]. Low abundance  
86 species are often favoured by negative-frequency-dependent selection [16, 17], which can be  
87 governed by nutritional requirements [18]. Bacteria capable of utilizing relatively few,  
88 abundantly available nutrients in a particular environment are nutritional specialists in the  
89 context of that environment. Generalists, on the contrary, are bacteria capable of utilizing more  
90 nutrient sources than their specialist counterparts. In negative frequency-dependent selection, the  
91 resources accessible to rapidly growing specialists will dwindle, reducing the fitness of the  
92 specialists as their population increases. As a result, the population of more generalist bacteria

93 capable of utilizing a wider range of nutrient sources will expand in a density-dependent manner  
94 [18, 19]. Generalists can also negatively affect the growth of specialists by competing for the  
95 resources that can be utilized by both of them [14].

96 Although growth of the rarely abundant subgroup D is facilitated in co-cultures, the degree of  
97 overlap in nutrient utilization among the subgroups and the range of nutrient utilization by  
98 individual subgroups are yet unknown. The objective of our present study was, therefore, to  
99 evaluate the amount of genomic and phenotypic overlap in nutrient utilization among the  
100 subgroups of *Gardnerella* and to determine if subgroup D is a nutritional generalist relative to  
101 the three other subgroups. Findings are interpreted in relation to the hypothesis that subgroup D  
102 is maintained in the vaginal microbiome through negative frequency dependent selection.

## 103 **Methods**

### 104 **Bacterial isolates**

105 Thirty-nine *Gardnerella* isolates from our culture collection representing all four subgroups  
106 (based on cpn60 barcode sequencing) were selected for the study ( $n = 12$  subgroup A, 12  
107 subgroup B, 8 subgroup C, and 7 subgroup D isolates) (Table S1). Isolates were streaked on  
108 Columbia agar plates with 5% (v/v) sheep blood and were incubated anaerobically at 37° C for  
109 48 h. For broth culture, colonies from blood agar plates were suspended in BHI broth  
110 supplemented with 10% horse serum and 0.25% (w/v) maltose.

### 111 **Whole-genome sequencing**

112 Whole genome sequences for 10 of the study isolates had been published previously, and the  
113 remaining 29 were sequenced as part of the current study (Table S1). DNA was extracted from  
114 isolates using a modified salting out protocol [20] and was stored at -20°C. DNA was quantified

115 using Qubit dsDNA BR assay kit (Invitrogen, Burlington, Ontario) and the quality of the extracts  
116 was assessed by the A260/A280 ratio. Isolate identity was confirmed by cpn60 barcode  
117 sequencing as follows. cpn60 barcode sequences were amplified from extracted DNA with the  
118 primers JH0665 (CGC CAG GGT TTT CCC AGT CAC GAC GAY GTT GCA GGY GAY  
119 GGH CHA CAA C) and JH0667 (AGC GGA TAA CAA TTT CAC ACA GGA GGR CGA  
120 TCR CCR AAK CCT GGA GCY TT). The reaction contained 2  $\mu$ L template DNA in 1 $\times$  PCR  
121 buffer (0.2 M Tris-HCl at pH 8.4, 0.5 M KCl), 2.5 mM MgCl<sub>2</sub>, 200  $\mu$ M dNTP mixture, 400 nM  
122 of each primer, 2 U AccuStart Taq DNA polymerase, and water to bring to a final volume of 50  
123  $\mu$ L. PCR was carried out with incubation at 94°C for 30 seconds, 40 cycles of 94°C 30 sec, 60°C  
124 for 1 min, 72°C for 1min, and final extension at 72°C for 10 min. PCR products were purified  
125 and sequenced by Sanger sequencing and compared with the chaperonin sequence database  
126 cpnDB [21] to confirm identity.

127 Following confirmation of the identity of isolates, sequencing libraries were prepared using the  
128 Nextera XT DNA library preparation kit according to the manufacturer's instructions (Illumina,  
129 Inc., San Diego, CA). PhiX DNA (15% [vol/vol]) was added to the indexed libraries before  
130 loading onto the flow cell. The 500 cycle V2 reagent kit was used for the Illumina MiSeq  
131 platform (Illumina, Inc.).

132 Raw sequences were trimmed using Trimmomatic [22] with a minimum quality score of 20 over  
133 a sliding window of 4, and minimum read length of 40. Trimmed sequences were assembled  
134 using SOAPdenovo2 [23] or SPAdes (NR002, NR043, NR044) [24]. Assembled genomes were  
135 annotated using the National Center for Biotechnology Information Prokaryotic Genome  
136 Annotation Pipeline [25].

137 **Pangenome analysis**

138 Pangenome analysis of the 39 study isolates and the published genome of *G. vaginalis* strain  
139 ATCC 14019 (Accession number: PRJNA55487) was performed using the micropan R package  
140 [26]. We used “complete” linkage for clustering, and the cut-off value for the generation of  
141 clusters was set to 0.75. For initial visualization of the results, the Jaccard index was used to  
142 calculate similarity of patterns of presence and absence of protein clusters among all isolates and  
143 a dendrogram was constructed from the results by unweighted pair group method with arithmetic  
144 mean (UPGMA) using DendroUPGMA (<http://genomes.urv.cat/UPGMA/>).

145 **COG analysis**

146 Predicted protein sequences from individual genomes were classified into Clusters of  
147 Orthologous Groups (COG) categories using WebMEGA  
148 (<http://weizhonglab.ucsd.edu/webMEGA/>). Based on the output from this process, the proportion  
149 of proteins in each of the COG categories was calculated for each genome. The distributions of  
150 proportional abundances of each category were then used to assess the relationships of the four  
151 subgroups in terms of COG category representation.

152 **Carbon source utilization assay**

153 Bacterial isolates from freezer stocks were streaked on 5% sheep blood agar plates and were  
154 grown for 48 h anaerobically, prior to inoculation of AN Microplates (Biolog Inc, Hayward,  
155 CA). Each plate contained 95 carbon sources and one blank well. Colonies of *Gardnerella*  
156 isolates were harvested using a sterile swab and suspended in 14 mL of inoculating fluid  
157 supplied by the manufacturer. The cell density was adjusted to 55%T (OD<sub>595</sub> approximately  
158 0.25) using a turbidimeter. Each well was filled with 100 µl of culture suspension and was

159 incubated at 35° C anaerobically for 48 h. All inoculations and incubations were performed in an  
160 anaerobic chamber containing 10 % CO<sub>2</sub>, 5% hydrogen, and 85% nitrogen. All plates were read  
161 visually after 48h of incubation. If there was no carbon source utilization, the wells remained  
162 colourless. A visual change from colourless to purple indicated carbon source utilization. To  
163 avoid bias in interpretation, a subset of the plates was read by a second observer who was  
164 blinded to the identity of the isolates. There was no disagreement between independent  
165 observers. The entire experiment was performed in two biological replicates.

### 166 **Carbon source profiling of co-cultures**

167 Representative isolates (VN003 of subgroup A, VN002 of subgroup B, NR001 of subgroup C,  
168 and WP012 of subgroup D) from the four subgroups were co-cultured in the Biolog AN  
169 Microplate in a pairwise fashion (n =6, AB, AC, AD, BC, BD, CD), by combining 50 µL of each  
170 isolate suspended in inoculation fluid in each well. The co-cultured AN Microplates were  
171 incubated at 35°C for 48h before being assessed visually for colour change. The experiment was  
172 repeated on separate days.

### 173 **Statistical analysis**

174 The degree of similarity between the isolates in terms of presence/absence of protein clusters  
175 generated in the pangenome analysis, proportional abundance of proteins in various COG  
176 categories, and carbon source utilization patterns were calculated using the Bray-Curtis  
177 dissimilarity matrix. Principle components analysis (PCA) was performed on the distance  
178 matrices and significance of relationships were tested using PERMANOVA with the ADONIS  
179 function in the *vegan* package [27]. The SIMPER function was used to identify variables driving  
180 the differences between groups.



181 One-way ANOVA, student's t-test and chi-square tests were applied to determine if utilization of  
182 particular carbon sources was associated with specific subgroups.

183 All statistical analyses were performed in RStudio (version 3.5.2). Figures were generated using  
184 GraphPad Prism 8.0 and RStudio (version 3.5.2).

## 185 **Results**

### 186 **Overlap between the subgroups based on pangenome and COG analysis**

187 The purpose of our pangenome analysis was to estimate the degree of niche overlap between  
188 *Gardnerella* subgroups based on comparisons of their predicted proteomes. Hierarchical  
189 clustering using complete linkage produced 4,868 clusters or predicted proteins in the  
190 pangenome of the 40 isolates included (rarefaction curve shown in Fig. S1). The strict core  
191 (defined as the protein clusters present in all isolates) included 176 clusters. Most of these core  
192 proteins were related to metabolism, transcriptional control, DNA replication, and protein  
193 synthesis. Clustering of the genomes by subgroup was apparent in a UPGMA dendrogram based  
194 on the presence/absence patterns of the 4,868 protein clusters (Fig. 1a). PCA was performed to  
195 determine the extent of overlap between the subgroups. The amount of variance explained by the  
196 two principal components was 19.4%, based on which, the four subgroups were separable (Fig.  
197 1b). The dissimilarity between the four subgroups was significant (pairwise-ADONIS,  
198 Bonferroni adjusted,  $p < 0.05$ , A vs B,  $R^2 = 0.45$ ; A vs C,  $R^2 = 0.48$ ; A vs D,  $R^2 = 0.26$ ; B vs C,  
199  $R^2 = 0.34$ ; B vs D,  $R^2 = 0.45$ ; and C vs D,  $R^2 = 0.55$ ).

200 Following the identification of core and accessory proteins, we investigated the distribution of  
201 functional classifications of proteins encoded by isolates in the four subgroups. COG analysis  
202 resulted in assignment of predicted proteins into 23 functional categories. As expected,

203 hierarchical clustering of the COG distribution patterns corresponded to subgroup affiliation  
204 (Fig. 2a). PCA was performed on the Bray-Curtis dissimilarity matrix and the differences  
205 between all subgroups were found to be significant (pairwise ADONIS, Bonferroni adjusted,  $p$   
206  $<0.05$ , A vs B,  $R^2 = 0.31$ ; A vs C,  $R^2 = 0.71$ ; A vs D,  $R^2 = 0.26$ ; B vs C,  $R^2 = 0.48$ ; B vs D,  $R^2 =$   
207  $0.20$ ; and C vs D,  $R^2 = 0.74$ ) (Fig. 2b).

208 We identified the variables which caused the four subgroups to diverge in terms of abundance of  
209 different COG categories in a multivariate analysis using SIMPER [28]. SIMPER calculates the  
210 contribution of each variable to the dissimilarity observed between two groups and relies on  
211 Bray-Curtis dissimilarity matrix for calculating the proportion of contribution of each variable  
212 being tested. Thirty-six percent of the differences between subgroup A and subgroup B were  
213 accounted for by amino acid transport and metabolism (COG category E), inorganic ion transport  
214 metabolism (category P), translation, ribosomal structure and biogenesis proteins (category J).  
215 The proportion of proteins with functions related to carbohydrate transport and metabolism  
216 (category G) was the major factor that differentiated subgroup A from C, contributing to 34% of  
217 the dissimilarity observed. Carbohydrate transport and metabolism also accounted for 31% of the  
218 dissimilarity observed between subgroups B and C and 36% of the dissimilarity between  
219 subgroups C and D. The major contributing factors that differentiated subgroup A and D were  
220 proportional abundance of proteins assigned to functional categories H (co-enzyme transport and  
221 metabolism) and E (amino acids transport and metabolism) (23%). Subgroups B from D were  
222 separated primarily based on functional categories P (inorganic ion transport and metabolism), J  
223 (translation, ribosomal structure and biogenesis), G (carbohydrate transport and metabolism  
224 proteins), and E (amino acid transport and metabolism proteins), which together accounted for  
225 37% of the dissimilarity observed.

## 226 **Functional categories of proteins differentiating subgroups of *Gardnerella***

227 We tested if the proportions of individual functional categories of proteins that drive the overall  
228 separation of the four subgroups in multivariate analysis were significantly different between  
229 pairs of *Gardnerella* subgroups. This analysis revealed that subgroup C has a significantly higher  
230 proportion of its encoded proteins associated with carbohydrate transport and metabolism and  
231 transport, and transcriptional regulation than the other subgroups (unpaired t-test,  $p \leq 0.01$ ,  
232 Bonferroni adjusted, Fig. 3a, 3d). The proportion of proteins associated with amino acid  
233 transport and metabolism is significantly higher in subgroup D than subgroups A, B, and C  
234 (unpaired t-test,  $p \leq 0.01$ , Bonferroni adjusted, Fig. 3b). Proteins involved in co-enzyme  
235 transport and metabolism were found in significantly higher proportional abundance in subgroup  
236 A than in subgroup B, C and D (unpaired t-test,  $p \leq 0.0001$ , Bonferroni adjusted, Fig. 3c).  
237 Subgroup B has a significantly higher abundance of proteins associated with inorganic ion  
238 transport and metabolism than subgroup A and D (unpaired t-test,  $p \leq 0.0001$ , Fig. 3e), but the  
239 difference between subgroup B and C was not significant. Subgroup B also has a significantly  
240 higher proportion of translation, ribosomal structure and biogenesis proteins (unpaired t-test,  $p \leq$   
241  $0.001$ , Fig. 3f) compared to subgroup C.

## 242 **Carbon source utilization phenotypes**

243 We hypothesized that subgroup D, a slow-growing, rarely detected *Gardnerella* subgroup is  
244 maintained in the vaginal microbiome at a low level and avoids competitive exclusion through  
245 negative-frequency-dependent selection, made possible by being a nutritional generalist. We  
246 performed carbon source utilization profiling of thirty-six representative isolates ( $n=12$ ,  
247 subgroup A;  $n=9$ , subgroup B;  $n=8$ , subgroup C (including type strain *G. vaginalis* ATCC  
248 14018); and  $n=7$ , subgroup D). The number of carbon sources utilized by any *Gardnerella* strain

249 ranged from 5 to 24. Only 25% (9/36) of the isolates utilized more than 17 carbon sources,  
250 including two subgroup C (NR001, NR038) and all subgroup D isolates. Twenty isolates utilized  
251 at least 13 carbon sources, including three subgroup A (3/12, 25%), four subgroup B (4/8, 50%),  
252 six subgroup C (6/7, 86%), and all seven isolates of subgroup D (100%). The average number of  
253 carbon sources utilized by isolates in subgroups A, B, C, and D was  $10.4 \pm 3.1$ ,  $11.8 \pm 1.75$ ,  
254  $13.9 \pm 3.6$ , and  $20.3 \pm 1.9$ , respectively (Fig. 4). A one-way ANOVA was performed to compare  
255 the overall difference in carbon sources utilization among the four subgroups showed significant  
256 difference among the subgroups ( $F(3,32) = 18.15$ ,  $p < 0.05$ ). A posthoc comparison between the  
257 subgroups revealed that the number of carbon sources utilized by subgroup D was significantly  
258 higher than subgroup A, B, and C (Tukey HSD,  $p < 0.05$ ). All of the tested *Gardnerella* isolates  
259 were able to utilize pyruvic acid, palatinose, and L-rhamnose. The next most frequently utilized  
260 carbon sources were D-fructose (32/36, 97%) and L-fucose (32/36, 97%).

261 Overall, 31/95 carbon sources were utilized by at least one isolate, and the majority (20/31) of  
262 these were sugars (mono- or oligosaccharides). Together, subgroup D isolates ( $n = 7$ ) utilized  
263 more of the sugar substrates (18/37 available) than any other subgroup, including subgroup C  
264 ( $n=8$ ), which utilized 15/37 available sugars. Utilization of any of the 11 available amino acids  
265 was rarely observed, with only two of the subgroup C isolates positive for L-methionine or L-  
266 valine utilization.

### 267 **Overlap in carbon sources utilization among the subgroups**

268 To determine if subgroups could be distinguished based on carbon source utilization profiles, a  
269 principal component analysis was performed (Fig. 5). The overlap between the representative  
270 isolates of subgroups A, B, and C was significant. Subgroup D was significantly dissimilar to

271 subgroups A and B (Fig. 5, pairwise-ADONIS, A vs D,  $R^2 = 0.55$ ; B vs D,  $R^2 = 0.55$ ,  $p < 0.05$ ).

272 Although the dissimilarity between subgroup C and D was not statistically significant after  
273 Bonferroni adjustment, 39% (pairwise ADONIS, C vs D,  $R^2 = 0.39$ ) of the variation in carbon  
274 source utilization could be explained by subgroup affiliation of the tested isolates, which was  
275 higher than between subgroups A, B and C (A vs B: 13%, A vs. C: 21%, and B vs. C: 8%).

### 276 **Association of carbon source utilization pattern with subgroups**

277 To identify carbon sources that differentiate the subgroups, we selected twelve substrates that  
278 were utilized by more than five isolates but fewer than thirty isolates. Chi-square tests were  
279 performed to determine if the subgroups significantly differ in the utilization of those twelve  
280 carbon sources. The four *Gardnerella* subgroups differed in their use of 3 of the 12 carbon  
281 sources: turanose, inosine, and uridine 5-monophosphate (Chi-square test,  $p < 0.05$ , Bonferroni  
282 adjusted) (Fig. 6). For each of these three carbon sources, subgroups A and B had low frequency  
283 of use ( $9.5\% = 2/21$ ,  $0.0\% = 0/21$ ,  $0.0\% = 0/21$ ; subgroups A and B combined), subgroup C had  
284 low or intermediate frequency of use ( $25.0\% = 2/8$ ,  $50.0\% = 4/8$ , and  $62.5\% = 5/8$ ), whereas  
285 subgroup D had high frequency of use ( $100.0\% = 7/7$ ,  $100.0\% = 7/7$ ,  $100.0\% = 7/7$ ).

### 286 **Carbon source utilization by co-cultured isolates**

287 Since the four subgroups co-exist in the same ecosystem, it is possible that mixing them might  
288 facilitate the utilization of certain carbon sources. To detect any such facilitation in carbon  
289 sources utilization, we co-cultured isolates from all four subgroups in six pairwise combinations  
290 (A+B, A+C, A+D, B+C, B+D, and C+D). The representative isolates of subgroups A-D utilized  
291 11, 13, 19 and 24 carbon sources, respectively, when grown alone while co-cultures utilized from  
292 12 to a maximum of 22 carbon sources (Table 1). In every case, the co-culture utilized fewer  
293 carbon sources than the isolate that utilized the most carbon sources on its own.

294

## 295 **Discussion**

296 Rarely abundant species can be maintained in the human microbiome through a variety of  
297 mechanisms, which include but are not limited to sequestration of essential nutrients from  
298 competing species, diversification of phenotype [29], social cheating [30], and negative  
299 frequency dependent selection [17]. Differences in nutrient utilization among community  
300 members can be a key factor that sets the stage for negative frequency dependent selection [31].

301 The reproductive fitness of nutritional specialist species will remain high as long as the supply of  
302 nutrients usable by the specialists is abundant. As soon as the supply of these nutrients drops,  
303 slower-growing generalists, by virtue of their greater utilization capacity, will have increased  
304 fitness, which will eventually lead to their dominance in the absence of any other negative  
305 influences.

306 Among the four subgroups of *Gardnerella* spp. that colonize the vaginal microbiome of  
307 reproductive-aged women, subgroup D is the rarest in terms of abundance and prevalence among  
308 women [4]. Subgroup D is also relatively slow-growing, yet shows an increased growth rate  
309 when the number of competitors in an *in vitro* community increases [12]. We have reported  
310 previously that resource-based competition is common among *Gardnerella* spp. and no evidence  
311 for contact-dependent interaction was observed. Therefore, we set out to investigate if negative-  
312 frequency dependent selection is responsible for persistence of subgroup D, which would require  
313 relatively small niche overlap and a more generalist lifestyle than the other *Gardnerella* spp. in  
314 the vaginal microbiome.

## 315 **Predicted niche overlap between the four subgroups**

316 Niche overlap may lead to competition for nutrients and space [31–34] and it has been reported  
317 that competition is prevalent among metabolically similar bacterial species [14]. Occupying  
318 distinct niches can therefore help bacterial species avoid competition for space, growth factors,  
319 and nutrients, resulting in increased reproductive fitness. Since subgroup D isolates have higher  
320 growth rates *in vitro* in the presence of competitors compared to when grown alone, these  
321 isolates presumably occupy a distinct niche. The pangenome analysis showed that the four  
322 subgroups differ significantly based on the composition of their predicted proteomes (Fig. 1),  
323 with only 176 proteins comprising the strict core of proteins found in all isolates. This finding is  
324 not surprising since the genetic diversity among *Gardnerella* is well established, and genome  
325 sequence comparisons formed the basis for the recent reclassification of *Gardnerella* into 13  
326 genome species [1–3].

327 Comparisons of the entire predicted proteomes do not, however, focus on the key factors for a  
328 resource-based competition: nutrient utilization potential. Proteins involved in nutrient uptake  
329 and metabolism account for only a fraction of the 4,868 protein clusters comprising the  
330 pangenome. Analysis of the distribution of various functional (COG) categories of proteins  
331 revealed significant differences among subgroups in their predicted capacity to utilize  
332 carbohydrates and amino acids (Fig. 3a, 3b), with subgroup D having significantly more of its  
333 proteome dedicated to amino acid transport and metabolism than any of the other subgroups.  
334 Since a resource-based competition encapsulates competition for space, growth factors and  
335 nutrients, our findings from the pangenome and COG analyses suggest that the competition  
336 among the four subgroups is not spatial but may be primarily for nutrients; a speculation  
337 supported by the previous observation that *Gardnerella* spp. form multi-subgroup biofilms [12].

338 **Subgroup D is a nutritional generalist relative to subgroup A, B and C**

339 The diversity of nutrients available to microbiota in the vaginal microbiome is less than in the  
340 gastrointestinal microbiome, where food intake provides a constant source of diverse nutrients  
341 that affect the assembly of gut microbiota [35, 36]. Vaginal microbiota, on the contrary, are  
342 largely dependent upon host-derived nutrients, the most abundant of which is glycogen.  
343 Glycogen is deposited in the vaginal lumen by epithelial cells under the influence of estrogen  
344 [37], and is digested into maltooligosaccharides, maltodextrins and glucose by the combined  
345 activities of host and microbial enzymes prior to uptake and metabolism by the microbiota [38–  
346 40]. Given the relatively narrow range of nutrients available in the vaginal microbiome, it is  
347 expected that the resident microbiota, including the four subgroups of *Gardnerella*, overlap to a  
348 considerable extent in their nutrient utilization capacity, resulting in some level of competition  
349 among them [32, 36, 41]. As discussed earlier, subgroup D is an exception since the growth of  
350 these isolates was actually facilitated in co-cultures, suggesting that while it may compete with  
351 other *Gardnerella* spp. over common nutrients like the breakdown products of glycogen, it may  
352 be able to utilize a greater overall diversity of nutrients (i.e. it is a generalist).

353 The AN microplate assay results showed that subgroup D isolates utilized more of the provided  
354 carbon sources than isolates in the three other subgroups (Fig. 4). Furthermore, when the patterns  
355 of substrate use were considered, subgroup A, B and C were not separable from each other, but  
356 subgroup D was significantly different (Fig. 5). The distinct pattern observed in subgroup D was  
357 partially driven by utilization of three particular substrates: turanose, inosine, and uridine 5-  
358 monophosphate (Fig. 6). Turanose is an isomer of sucrose, known as a non-accumulative  
359 osmoprotectant, aiding bacterial growth at high osmolarity [42]. The importance of turanose  
360 utilization in the vaginal environment is not known yet, but our observation is an indication that  
361 subgroup D isolates can metabolize sucrose-like sugars. The two other carbon sources: inosine



362 and uridine 5-monophosphate are probably used in purine and pyrimidine biosynthesis in  
363 *Gardnerella* spp..

364 Some findings of the pangenome and COG analyses could not be reconciled with the phenotypic  
365 carbon source utilization assay. For example, although subgroup C and D have higher  
366 proportions of their proteomes predicted to be involved in transport and metabolism of  
367 carbohydrates (Category G) and amino acids (Category E), respectively, than the other  
368 subgroups, subgroup C isolates did not utilize the greatest number of available sugar substrates  
369 in the AN microplate and subgroup D isolates did not utilize any of the amino acid substrates  
370 available. It is, however, important to consider that the carbon source utilization assay was  
371 performed in a plastic environment and included only 95 substrates, many of which are not  
372 relevant to the vaginal microbiome. More relevant amino acid sources available in the vagina,  
373 including those whose abundance is altered in bacterial vaginosis, such as isoleucine, leucine,  
374 proline, and tryptophan, are not included [43–45]. Ideally, this study would have involved a  
375 vaginal-microbiome specific nutrient panel, but such reagents were not available. Even with this  
376 limitation, our results suggest that subgroup D is a nutritional generalist relative to other  
377 *Gardnerella* spp.. Most of the ecological studies that have been performed to date to elucidate  
378 mechanisms shaping the assembly of bacterial communities have included either environmental  
379 bacterial species or well-characterized model organisms [14, 16, 29, 36, 41, 46–50]. There are  
380 understandably fewer studies that focus on interactions among host-associated microbiota [51,  
381 52].

### 382 **Negative-frequency-dependent selection in the vaginal microbiome**

383 The genomic and phenotypic differences we observed between subgroup D and the three other  
384 subgroups, including the potential to utilize more amino acids, use of a greater number of carbon

385 sources, and a distinct pattern of substrate utilization, suggest that subgroup D is a candidate for  
386 negative frequency dependent selection. Why then are these *Gardnerella* spp. only observed  
387 rarely, and in low abundance in reproductive aged women? Among 413 vaginal samples from  
388 reproductive aged Canadian women, genome species comprising subgroup D of *Gardnerella*  
389 were detected in <10% of samples and never accounted for more than 5% of the microbiota [4].  
390 Vaginal environmental dynamics and related host factors, such as menstruation, sloughing of  
391 epithelial cells, and fluctuating pH contribute to the turnover of bacterial species, shifting the  
392 bacterial population density and changing the nutrients available [53]. A decline in population  
393 density would reshuffle the vaginal ecosystem, increasing the supply of abundant nutrients  
394 accessible to faster growing, specialists, and checking the growth of slower growing generalist  
395 subgroup D.

396 Although subgroup D is likely rare due the factors described above, it could still be a major  
397 player in ecological succession and transition of vaginal microbiota between a *Lactobacillus*  
398 dominated community and the overgrowth of anaerobes characteristic of bacterial vaginosis.  
399 These organisms may also play a particular role in biofilm formation or competition for  
400 occupancy of the vaginal mucosa. Rarely abundant species often act as keystone species helping  
401 colonization by other bacterial species, which are also essential to maintain homeostasis of an  
402 ecosystem [54–57]. Resolution of the role of low abundant *Gardnerella* spp. will depend on the  
403 development and application of experimental systems that more closely model the human  
404 vaginal microbiome. Rodent models have shown some promise, especially for studies of specific  
405 combinations of organisms [58], but there is also potential in bioreactors [59], and cell and tissue  
406 culture systems that attempt to recapitulate many of the environmental and physiological aspects

407 of the vaginal microbiome [60]. Further study of rare *Gardnerella* spp. will likely also result in  
408 the definition of additional species within this diverse genus.

#### 409 **Acknowledgements**

410 The authors are grateful to Champika Fernando for excellent technical support and to all  
411 members of the Hill Lab for their review of the manuscript. Special thanks to Prairie Diagnostic  
412 Services for access to their anaerobic chamber. No thanks to COVID-19.

#### 413 **Declarations**

#### 414 **Funding**

415 The research was supported by a Natural Sciences and Engineering Research Council of Canada  
416 Discovery Grant to JEH.

#### 417 **Competing interests**

418 None declared.

#### 419 **Availability of data and material**

420 NCBI Bioproject accession numbers for all genome sequence data are included in Table S1.

#### 421 **Authors' contributions**

422 Conceived and designed the study: Salahuddin Khan and Janet E. Hill. Performed the  
423 experiments: Salahuddin Khan and Sarah J. Vancuren. Analysed the data: Salahuddin Khan,  
424 Sarah J. Vancuren, Janet E. Hill. Wrote and revised the manuscript: Salahuddin Khan, Sarah J.  
425 Vancuren, Janet E. Hill.

## 426 References

- 427 1. Paramel Jayaprakash T, Schellenberg JJ, Hill JE (2012) Resolution and characterization of  
428 distinct cpn60-based subgroups of *Gardnerella vaginalis* in the vaginal microbiota. PLoS  
429 ONE 7:e43009. <https://doi.org/10.1371/journal.pone.0043009>
- 430 2. Ahmed A, Earl J, Retchless A, et al (2012) Comparative genomic analyses of 17 clinical  
431 isolates of *Gardnerella vaginalis* provide evidence of multiple genetically isolated clades  
432 consistent with subspeciation into genovars. J Bacteriol 194:3922–37.  
433 <https://doi.org/10.1128/JB.00056-12>
- 434 3. Vanechoutte M, Guschin A, Van Simaey L, et al (2019) Emended description of  
435 *Gardnerella vaginalis* and description of *Gardnerella leopoldii* sp. nov., *Gardnerella piovii*  
436 sp. nov. and *Gardnerella swidsinskii* sp. nov., with delineation of 13 genomic species within  
437 the genus *Gardnerella*. Int J Syst Evol Microbiol 69:679–687.  
438 <https://doi.org/10.1099/ijsem.0.003200>
- 439 4. Hill JE, Albert AYK (2019) Resolution and co-occurrence patterns of *Gardnerella leopoldii*,  
440 *Gardnerella swidsinskii*, *Gardnerella piovii* and *Gardnerella vaginalis* within the vaginal  
441 microbiome. Infect Immun 87:e00532-19. <https://doi.org/10.1128/IAI.00532-19>
- 442 5. Janulaitiene M, Gegzna V, Baranauskiene L, et al (2018) Phenotypic characterization of  
443 *Gardnerella vaginalis* subgroups suggests differences in their virulence potential. PLoS  
444 ONE 13:e0200625. <https://doi.org/10.1371/journal.pone.0200625>
- 445 6. Yeoman CJ, Yildirim S, Thomas SM, et al (2010) Comparative genomics of *Gardnerella*  
446 *vaginalis* strains reveals substantial differences in metabolic and virulence potential. PLoS  
447 ONE 5:e12411. <https://doi.org/10.1371/journal.pone.0012411>
- 448 7. Schellenberg JJ, Paramel Jayaprakash T, Withana Gamage N, et al (2016) *Gardnerella*  
449 *vaginalis* subgroups defined by cpn60 sequencing and sialidase activity in isolates from  
450 Canada, Belgium and Kenya. PLoS One 11:e0146510.  
451 <https://doi.org/10.1371/journal.pone.0146510>
- 452 8. Albert AY, Chaban B, Wagner EC, et al (2015) A study of the vaginal microbiome in  
453 healthy Canadian women utilizing cpn60-based molecular profiling reveals distinct  
454 *Gardnerella* subgroup community state types. PLoS One 10:e0135620.  
455 <https://doi.org/10.1371/journal.pone.0135620>
- 456 9. Hilbert DW, Schuyler JA, Adelson ME, et al (2017) *Gardnerella vaginalis* population  
457 dynamics in bacterial vaginosis. Eur J Clin Microbiol Infect Dis.  
458 <https://doi.org/10.1007/s10096-017-2933-8>
- 459 10. Shipitsyna E, Krysanova A, Khayrullina G, et al (2019) Quantitation of all four *Gardnerella*  
460 *vaginalis* clades detects abnormal vaginal microbiota characteristic of bacterial vaginosis  
461 more accurately than putative *G. vaginalis* sialidase A gene count. Mol Diagn Ther 23:139–  
462 147. <https://doi.org/10.1007/s40291-019-00382-5>

- 463 11. Schellenberg JJ, Patterson MH, Hill JE (2017) *Gardnerella vaginalis* diversity and ecology  
464 in relation to vaginal symptoms. Res Microbiol doi:10.1016/j.resmic.2017.02.011:  
465 <https://doi.org/10.1016/j.resmic.2017.02.011>
- 466 12. Khan S, Voordouw MJ, Hill JE (2019) Competition among *Gardnerella* subgroups from the  
467 human vaginal microbiome. Front Cell Infect Microbiol 9:374.  
468 <https://doi.org/10.3389/fcimb.2019.00374>
- 469 13. Madsen JS, Røder HL, Russel J, et al (2016) Coexistence facilitates interspecific biofilm  
470 formation in complex microbial communities. Environ Microbiol 18:2565–2574.  
471 <https://doi.org/10.1111/1462-2920.13335>
- 472 14. Russel J, Røder HL, Madsen JS, et al (2017) Antagonism correlates with metabolic similarity  
473 in diverse bacteria. Proc Natl Acad Sci U S A 114:10684–10688.  
474 <https://doi.org/10.1073/pnas.1706016114>
- 475 15. Darwin C (1859) On the origin of species by means of natural selection, or preservation of  
476 favoured races in the struggle for life. John Murray, London
- 477 16. Hibbing ME, Fuqua C, Parsek MR, Peterson SB (2010) Bacterial competition: surviving and  
478 thriving in the microbial jungle. Nat Rev Microbiol 8:15–25.  
479 <https://doi.org/10.1038/nrmicro2259>
- 480 17. Levin BR (1988) Frequency-dependent selection in bacterial populations. Philos Trans R Soc  
481 Lond B Biol Sci 319:459–472. <https://doi.org/10.1098/rstb.1988.0059>
- 482 18. Kurihara Y, Shikano S, Toda M (1990) Trade-off between interspecific competitive ability  
483 and growth rate in bacteria. Ecology 71:645–650. <https://doi.org/10.2307/1940318>
- 484 19. Ross-Gillespie A, Gardner A, Buckling A, et al (2009) Density dependence and cooperation:  
485 theory and a test with bacteria. Evolution 63:2315–2325. <https://doi.org/10.1111/j.1558-5646.2009.00723.x>
- 487 20. Martin-Platero AM, Valdivia E, Maqueda M, Martinez-Bueno M (2007) Fast, convenient,  
488 and economical method for isolating genomic DNA from lactic acid bacteria using a  
489 modification of the protein “salting-out” procedure. Anal Biochem 366:102–4.  
490 [https://doi.org/S0003-2697\(07\)00159-5](https://doi.org/S0003-2697(07)00159-5) [pii] 10.1016/j.ab.2007.03.010
- 491 21. Vancuren SJ, Hill JE (2019) Update on cpnDB: a reference database of chaperonin  
492 sequences. Database 2019:baz033 <https://doi.org/10.1093/database/baz033>
- 493 22. Bolger AM, Lohse M, Usadel B (2014) Trimmomatic: a flexible trimmer for Illumina  
494 sequence data. Bioinformatics 30:2114–20. <https://doi.org/10.1093/bioinformatics/btu170>
- 495 23. Luo R, Liu B, Xie Y, et al (2012) SOAPdenovo2: an empirically improved memory-efficient  
496 short-read *de novo* assembler. Gigascience 1:18. <https://doi.org/10.1186/2047-217X-1-18>

- 497 24. Prjibelski A, Antipov D, Meleshko D, et al (2020) Using SPAdes De Novo Assembler. *Curr*  
498 *Protoc Bioinforma* 70:e102. <https://doi.org/10.1002/cpbi.102>
- 499 25. Tatusova T, DiCuccio M, Badretdin A, et al (2016) NCBI prokaryotic genome annotation  
500 pipeline. *Nucleic Acids Res* 44:6614–6624. <https://doi.org/10.1093/nar/gkw569>
- 501 26. Snipen L, Liland KH (2015) micropan: an R-package for microbial pan-genomics. *BMC*  
502 *Bioinformatics* 16:79. <https://doi.org/10.1186/s12859-015-0517-0>
- 503 27. Oksanen J, Blanchet FG, Kindt R, et al (2012) vegan: Community Ecology Package. R  
504 package version 2.0-10. Available: <http://CRAN.R-project.org/package=vegan>
- 505 28. Whitfield-Cargile CM, Cohen ND, Suchodolski J, et al (2015) Composition and diversity of  
506 the fecal microbiome and inferred fecal metagenome does not predict subsequent pneumonia  
507 caused by *Rhodococcus equi* in foals. *PLOS ONE* 10:e0136586.  
508 <https://doi.org/10.1371/journal.pone.0136586>
- 509 29. Martín PV, Muñoz MA, Pigolotti S (2019) Bet-hedging strategies in expanding populations.  
510 *PLOS Comput Biol* 15:e1006529. <https://doi.org/10.1371/journal.pcbi.1006529>
- 511 30. Chen R, Déziel E, Groleau M-C, et al (2019) Social cheating in a *Pseudomonas aeruginosa*  
512 quorum-sensing variant. *Proc Natl Acad Sci* 116:7021–7026.  
513 <https://doi.org/10.1073/pnas.1819801116>
- 514 31. Freter R, Brickner H, Botney M, et al (1983) Mechanisms that control bacterial populations  
515 in continuous-flow culture models of mouse large intestinal flora. *Infect Immun* 39:676–685.  
516 <https://doi.org/10.1128/IAI.39.2.676-685.1983>
- 517 32. Holt RD (2009) Bringing the Hutchinsonian niche into the 21st century: Ecological and  
518 evolutionary perspectives. *Proc Natl Acad Sci* 106:19659–19665.  
519 <https://doi.org/10.1073/pnas.0905137106>
- 520 33. Hutchinson GE (1957) Concluding Remarks. *Cold Spring Harb Symp Quant Biol* 22:415–  
521 427. <https://doi.org/10.1101/SQB.1957.022.01.039>
- 522 34. Amarasekare P (2002) Interference competition and species coexistence. *Proc R Soc Lond B*  
523 *Biol Sci* 269:2541–2550. <https://doi.org/10.1098/rspb.2002.2181>
- 524 35. Graf D, Di Cagno R, Fåk F, et al (2015) Contribution of diet to the composition of the human  
525 gut microbiota. *Microb Ecol Health Dis* 26:26164. <https://doi.org/10.3402/mehd.v26.26164>
- 526 36. Smith CC, Snowberg LK, Gregory Caporaso J, et al (2015) Dietary input of microbes and  
527 host genetic variation shape among-population differences in stickleback gut microbiota.  
528 *ISME J* 9:2515–2526. <https://doi.org/10.1038/ismej.2015.64>
- 529 37. Mirmonsef P, Hotton AL, Gilbert D, et al (2014) Free glycogen in vaginal fluids is  
530 associated with *Lactobacillus* colonization and low vaginal pH. *PLoS One* 9:e102467.  
531 <https://doi.org/10.1371/journal.pone.0102467>

- 532 38. Bhandari P, Tingley JP, Abbott DW, Hill JE (2020) Characterization of an  $\alpha$ -glucosidase  
533 enzyme conserved in *Gardnerella* spp. isolated from the human vaginal microbiome.  
534 bioRxiv 2020.05.11.086124. <https://doi.org/10.1101/2020.05.11.086124>
- 535 39. Nunn KL, Forney LJ (2016) Unraveling the dynamics of the human vaginal microbiome.  
536 *Yale J Biol Med* 89:331–337
- 537 40. Spear GT, French AL, Gilbert D, et al (2014) Human alpha-amylase present in lower-  
538 genital-tract mucosal fluid processes glycogen to support vaginal colonization by  
539 *Lactobacillus*. *J Infect Dis* 210:1019–1028. <https://doi.org/10.1093/infdis/jiu231>
- 540 41. Bauer MA, Kainz K, Carmona-Gutierrez D, Madeo F (2018) Microbial wars: Competition in  
541 ecological niches and within the microbiome. *Microb Cell* 5:215–219.  
542 <https://doi.org/10.15698/mic2018.05.628>
- 543 42. Gouffi K, Blanco C (2000) Is the accumulation of osmoprotectant the unique mechanism  
544 involved in bacterial osmoprotection? *Int J Food Microbiol* 55:171–174.  
545 [https://doi.org/10.1016/s0168-1605\(00\)00192-6](https://doi.org/10.1016/s0168-1605(00)00192-6)
- 546 43. Srinivasan S, Morgan MT, Fiedler TL, et al (2015) Metabolic signatures of bacterial  
547 vaginosis. *mBio* 6:. <https://doi.org/10.1128/mBio.00204-15>
- 548 44. Vicente-Muñoz S, Cobo T, Puchades-Carrasco L, et al (2020) Vaginal metabolome: towards  
549 a minimally invasive diagnosis of microbial invasion of the amniotic cavity in women with  
550 preterm labor. *Sci Rep* 10:5465. <https://doi.org/10.1038/s41598-020-62542-6>
- 551 45. Vitali B, Cruciani F, Picone G, et al (2015) Vaginal microbiome and metabolome highlight  
552 specific signatures of bacterial vaginosis. *Eur J Clin Microbiol Infect Dis* 34:2367–2376.  
553 <https://doi.org/10.1007/s10096-015-2490-y>
- 554 46. Stubbendieck RM, Straight PD (2015) Escape from lethal bacterial competition through  
555 coupled activation of antibiotic resistance and a mobilized subpopulation. *PLOS Genet*  
556 11:e1005722. <https://doi.org/10.1371/journal.pgen.1005722>
- 557 47. Gonzalez DJ, Haste NM, Hollands A, et al (2011) Microbial competition between *Bacillus*  
558 *subtilis* and *Staphylococcus aureus* monitored by imaging mass spectrometry. *Microbiology*  
559 157:2485–2492. <https://doi.org/10.1099/mic.0.048736-0>
- 560 48. Griffin AS, West SA, Buckling A (2004) Cooperation and competition in pathogenic  
561 bacteria. *Nature* 430:1024–1027. <https://doi.org/10.1038/nature02744>
- 562 49. Oliveira NM, Martinez-Garcia E, Xavier J, et al (2015) Biofilm formation as a response to  
563 ecological competition. *PLoS Biol* 13:e1002191.  
564 <https://doi.org/10.1371/journal.pbio.1002191>
- 565 50. Rezzoagli C, Granato ET, Kümmerli R (2020) Harnessing bacterial interactions to manage  
566 infections: a review on the opportunistic pathogen *Pseudomonas aeruginosa* as a case  
567 example. *J Med Microbiol* 69:147–161. <https://doi.org/10.1099/jmm.0.001134>



- 568 51. García-Bayona L, Comstock LE (2018) Bacterial antagonism in host-associated microbial  
569 communities. *Science* 361:. <https://doi.org/10.1126/science.aat2456>
- 570 52. Rakoff-Nahoum S, Foster KR, Comstock LE (2016) The evolution of cooperation within the  
571 gut microbiota. *Nature* 533:255–259. <https://doi.org/10.1038/nature17626>
- 572 53. Abreu CI, Friedman J, Andersen Woltz VL, Gore J (2019) Mortality causes universal  
573 changes in microbial community composition. *Nat Commun* 10:2120.  
574 <https://doi.org/10.1038/s41467-019-09925-0>
- 575 54. Banerjee S, Schlaeppi K, van der Heijden MGA (2018) Keystone taxa as drivers of  
576 microbiome structure and functioning. *Nat Rev Microbiol* 16:567–576.  
577 <https://doi.org/10.1038/s41579-018-0024-1>
- 578 55. Herren CM, McMahon KD (2018) Keystone taxa predict compositional change in microbial  
579 communities. *Environ Microbiol* 20:2207–2217. <https://doi.org/10.1111/1462-2920.14257>
- 580 56. Hajishengallis G, Liang S, Payne MA, et al (2011) A low-abundance biofilm species  
581 orchestrates inflammatory periodontal disease through the commensal microbiota and the  
582 complement pathway. *Cell Host Microbe* 10:497–506.  
583 <https://doi.org/10.1016/j.chom.2011.10.006>
- 584 57. Maldonado-Contreras A, Goldfarb KC, Godoy-Vitorino F, et al (2011) Structure of the  
585 human gastric bacterial community in relation to *Helicobacter pylori* status. *ISME J* 5:574–  
586 579. <https://doi.org/10.1038/ismej.2010.149>
- 587 58. Teixeira GS, Carvalho FP, Arantes RM, et al (2012) Characteristics of *Lactobacillus* and  
588 *Gardnerella vaginalis* from women with or without bacterial vaginosis and their  
589 relationships in gnotobiotic mice. *J Med Microbiol* 61:1074–81.  
590 <https://doi.org/10.1099/jmm.0.041962-0>
- 591 59. Guzman-Rodriguez M, McDonald JAK, Hyde R, et al (2018) Using bioreactors to study the  
592 effects of drugs on the human microbiota. *Methods* 149:31–41.  
593 <https://doi.org/10.1016/j.jymeth.2018.08.003>
- 594 60. Herbst-Kralovetz MM, Pyles RB, Ratner AJ, et al (2016) New systems for studying  
595 intercellular interactions in bacterial vaginosis. *J Infect Dis* 214:S6–S13.  
596 <https://doi.org/10.1093/infdis/jiw130>
- 597



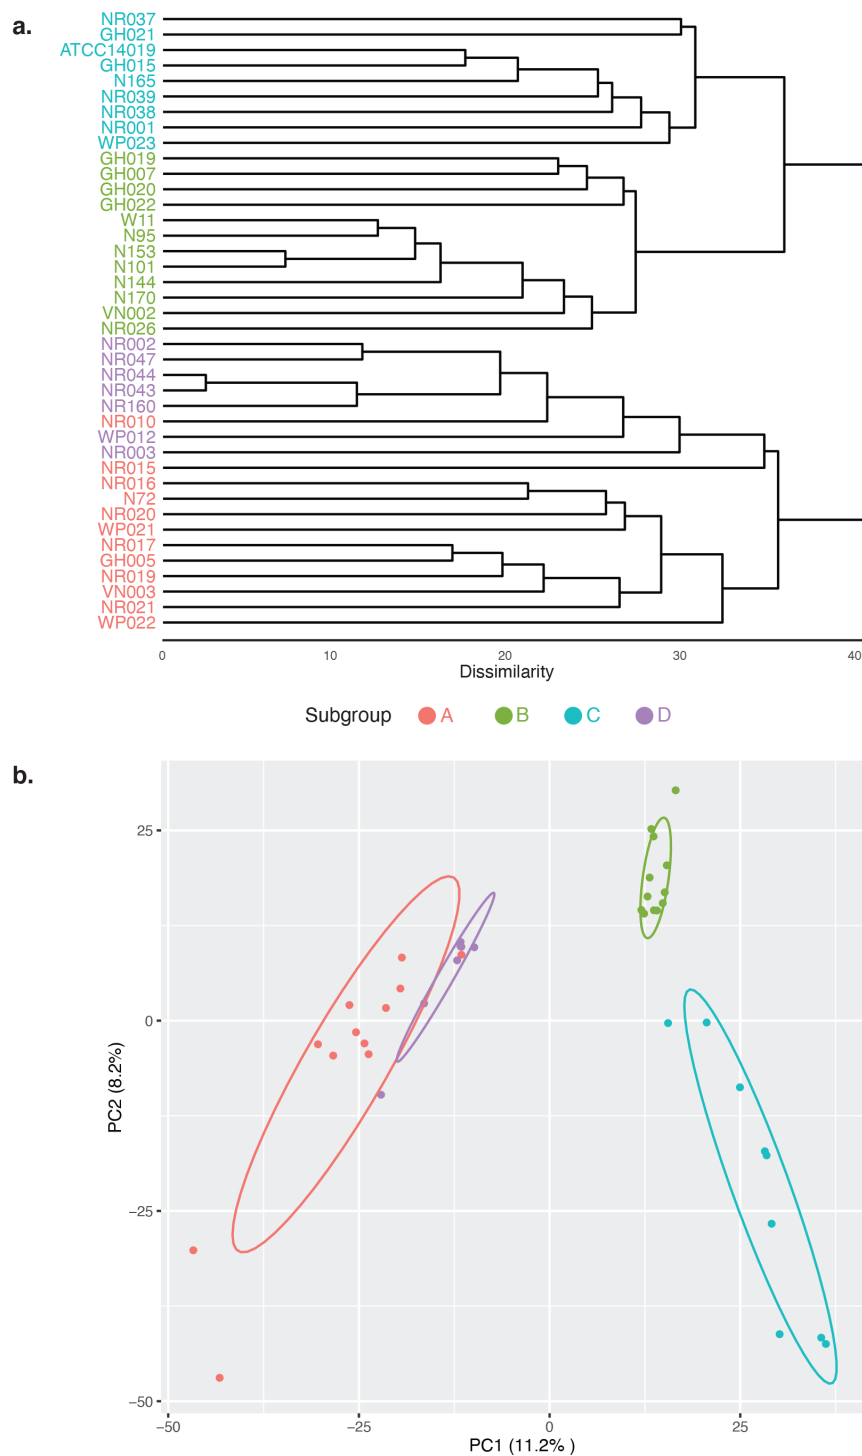

598

599 **Fig. 1** Comparison of predicted proteomes of study isolates. **(a)** UPGMA dendrogram based on  
600 presence/absence of protein clusters in the predicted proteomes of *Gardnerella* isolates. **(b)**  
601 Principle components analysis (PCA) of Bray-Curtis dissimilarity matrices calculated from  
602 protein cluster distributions. Dissimilarity between the four subgroups is significant (pairwise  
603 ADONIS  $p < 0.05$ , Bonferroni adjusted). Subgroup affiliations of isolates are indicated by colour  
604 as shown in the legend between the panels.

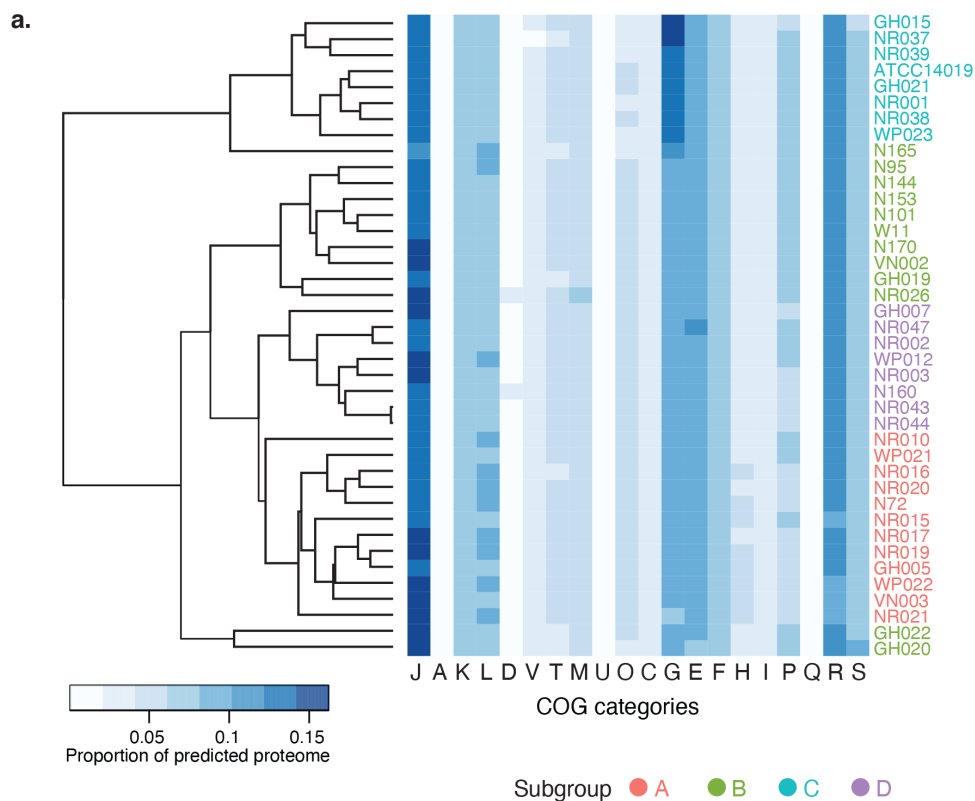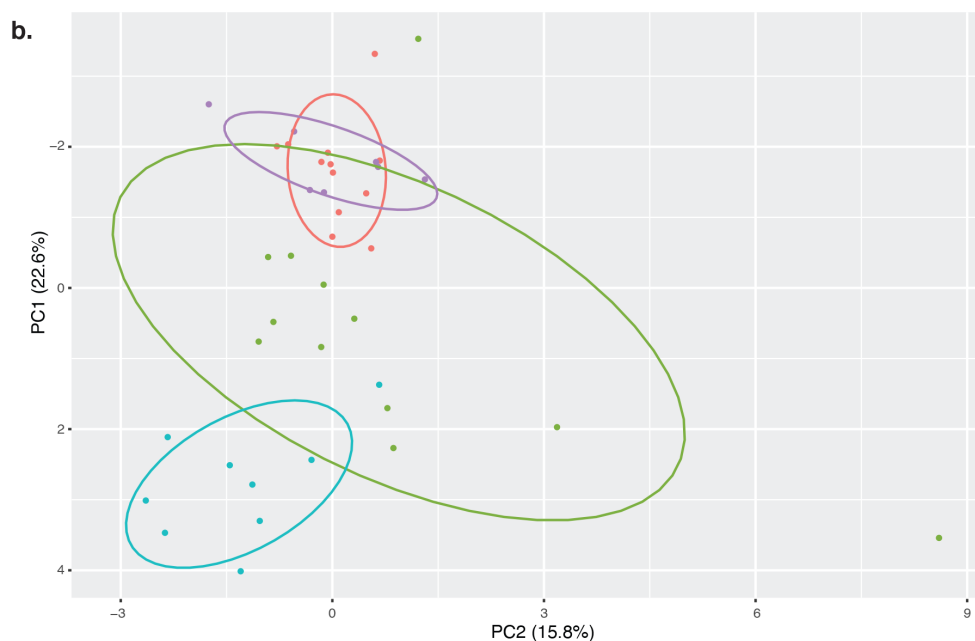

605  
606 **Fig. 2** COG analysis of predicted proteomes. **(a)** Hierarchical clustering of study isolates based  
607 on proportional abundance of COG categories in their predicted proteomes. Abundance is  
608 indicated by blue colour intensity in the heat map. **(b)** PCA of Bray-Curtis dissimilarity matrices  
609 calculated from the proportional abundance data. Dissimilarity between the four subgroups is  
610 significant (pairwise ADONIS,  $p < 0.05$ , Bonferroni adjusted). Subgroup affiliations of isolates  
611 are indicated by colour as shown in the legend between the panels.

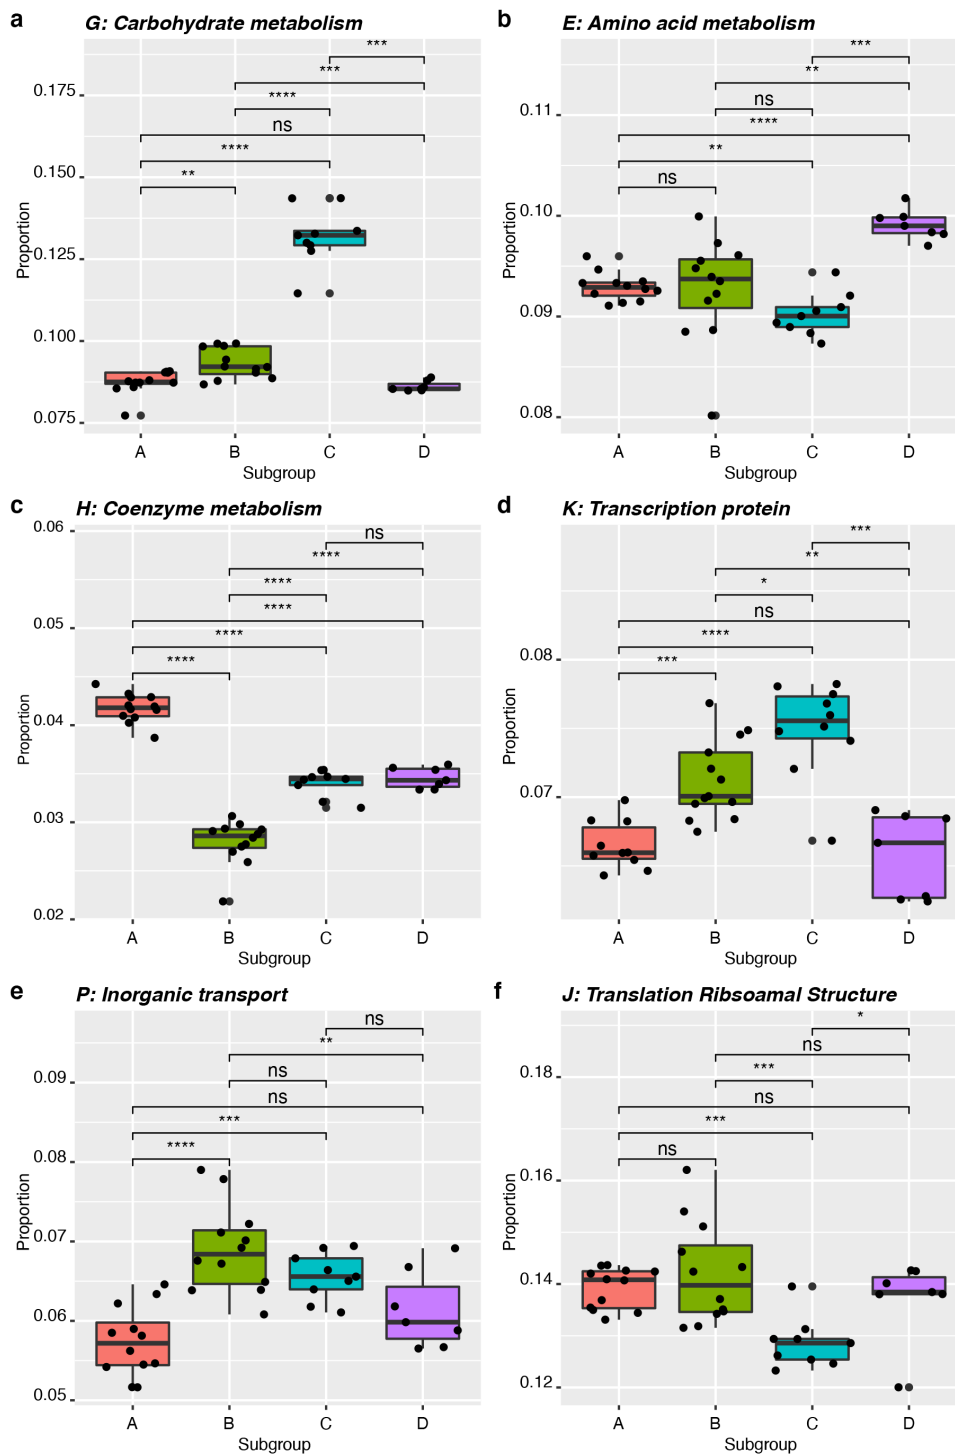

612  
 613 **Fig. 3** Differential abundance of six COG categories that were identified by SIMPER analysis as  
 614 main drivers of subgroup separation. **(a)** carbohydrate metabolism and transport proteins  
 615 (Category G), **(b)** amino acid transport and metabolism proteins (Category E), **(c)** co-enzyme  
 616 transport and metabolism proteins (Category H), **(d)** transcription proteins (Category K), **(e)**  
 617 inorganic ion transport and metabolism proteins (Category P), and **(f)** translation, ribosomal  
 618 structure and biogenesis proteins (Category J). Results of unpaired t-tests are indicated where \*  
 619 is  $p \leq 0.05$  , \*\* is  $p \leq 0.01$  , \*\*\* is  $p \leq 0.001$  , \*\*\*\* is  $p \leq 0.0001$  and ns is not significant.

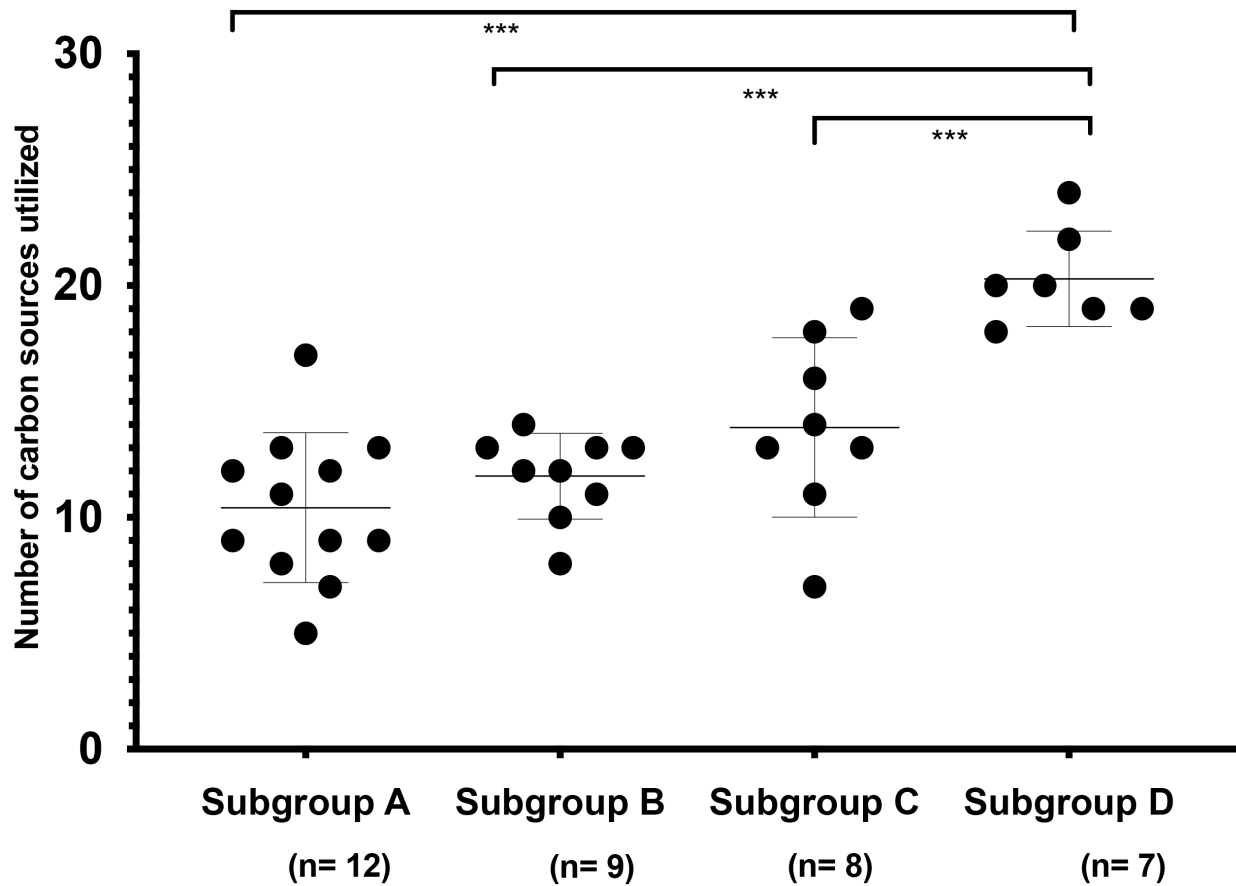

620  
621  
622  
623  
624  
625  
626

**Fig. 4** Comparison of numbers of carbon sources utilized by isolates in each subgroup. The number of carbon sources utilized by isolates in subgroup D was significantly higher than those in subgroups A, B and C (TukeyHSD,  $p \leq 0.001$ ). Only one fourth (9/36) of the tested isolates utilized more than 17 carbon sources, including all seven tested isolates of subgroup D.

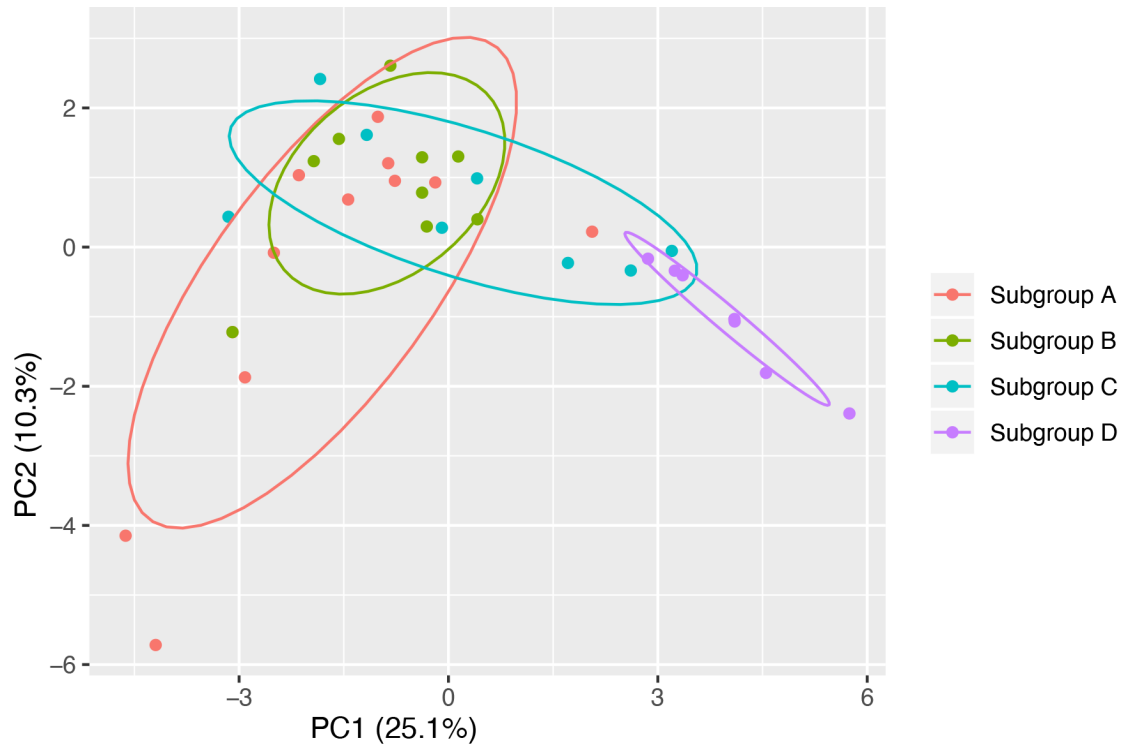

627  
628  
629  
630  
631  
632  
633  
634  
635

**Fig. 5** Subgroup D has minimal overlap with the other subgroups in carbon source utilization. The degree of variation based on carbon source utilization between subgroup D and subgroups A and B was significant (pairwise ADONIS,  $p < 0.05$ , after Bonferroni adjustment). The variation in carbon sources utilization between subgroup C and D can be explained by subgroup affiliation in 39% of cases. Overall, 42% of differences in carbon sources utilization between subgroups can be explained by their subgroup affiliation (Adonis,  $R^2 = 0.42$ ,  $p < 0.05$ ).

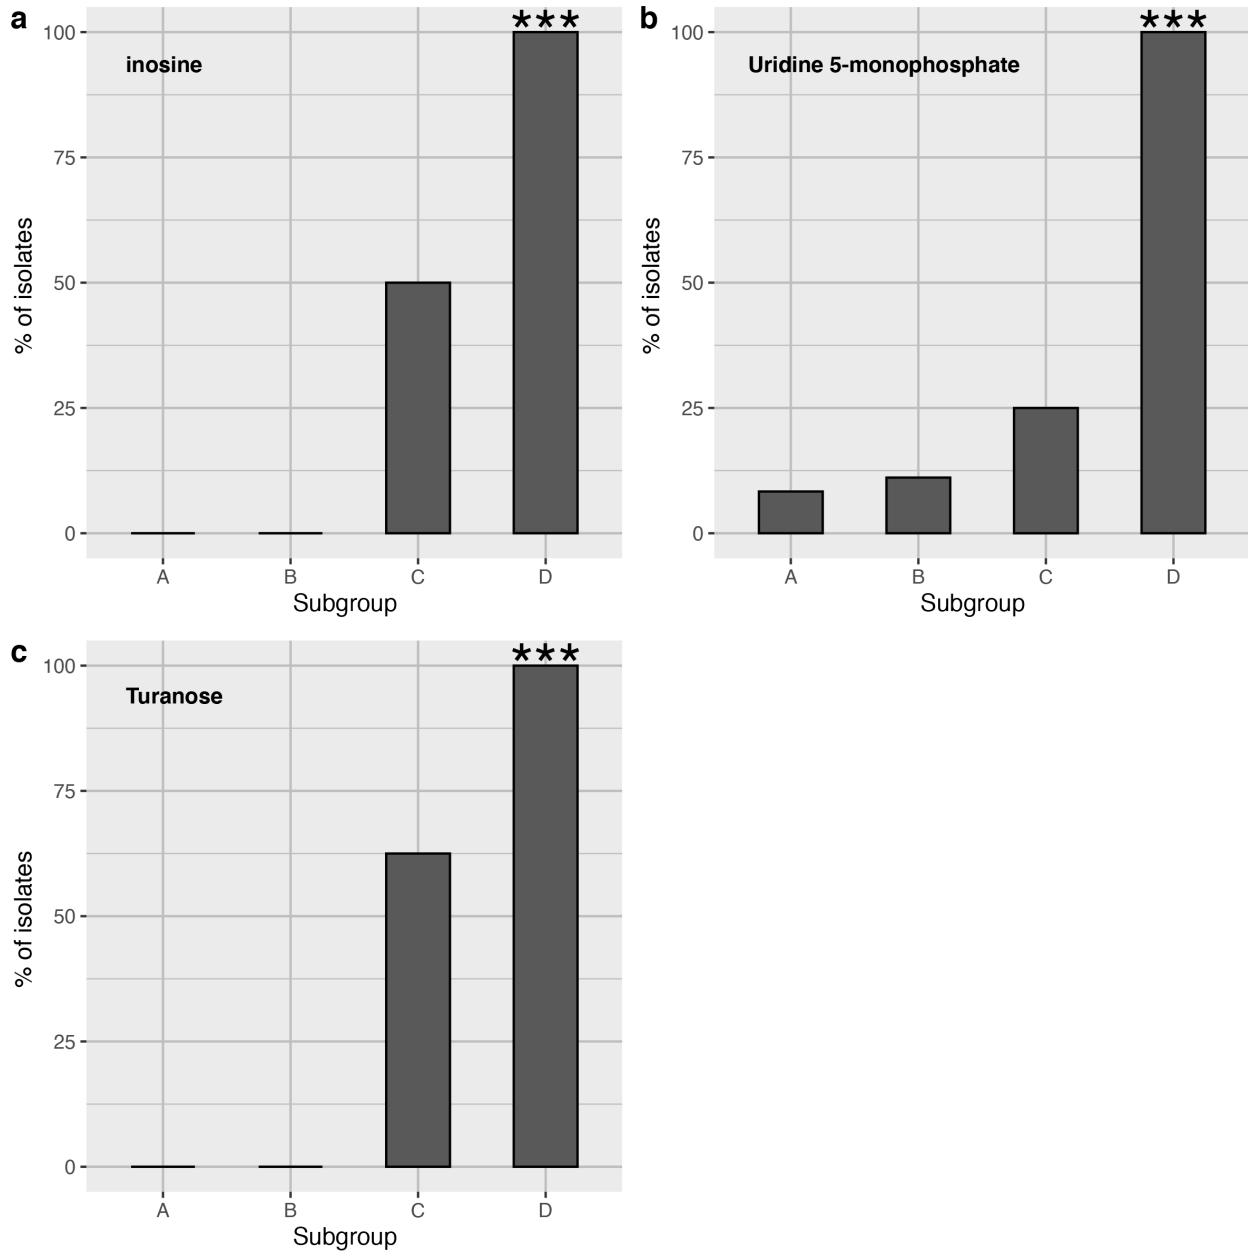

636  
637  
638  
639  
640  
641  
642

**Fig. 6** Subgroup D can be differentiated from the other subgroups based on its capacity to utilize inosine (a), uridine 5-monophosphate (b), and turanose (c). The percentage of isolates in each subgroup that utilize the indicated carbon source is shown. The utilization of these three carbon sources is significantly associated with subgroup D (Chi-square test,  $p \leq 0.001$ ).

643 **Table 1.** Carbon source utilization by co-cultured isolates

| Isolate 1<br>(Subgroup) | Isolate 2<br>(Subgroup) | No. carbon sources |           |            |
|-------------------------|-------------------------|--------------------|-----------|------------|
|                         |                         | Isolate 1          | Isolate 2 | Co-culture |
| VN003 (A)               | VN002 (B)               | 11                 | 13        | 12         |
| VN003 (A)               | NR001 (C)               | 11                 | 19        | 13         |
| VN003 (A)               | WP012 (D)               | 11                 | 24        | 22         |
| VN002 (B)               | NR001 (C)               | 13                 | 19        | 15         |
| VN002 (B)               | WP012 (D)               | 13                 | 24        | 20         |
| NR001 (C)               | WP012 (D)               | 19                 | 24        | 19         |

644

645

646

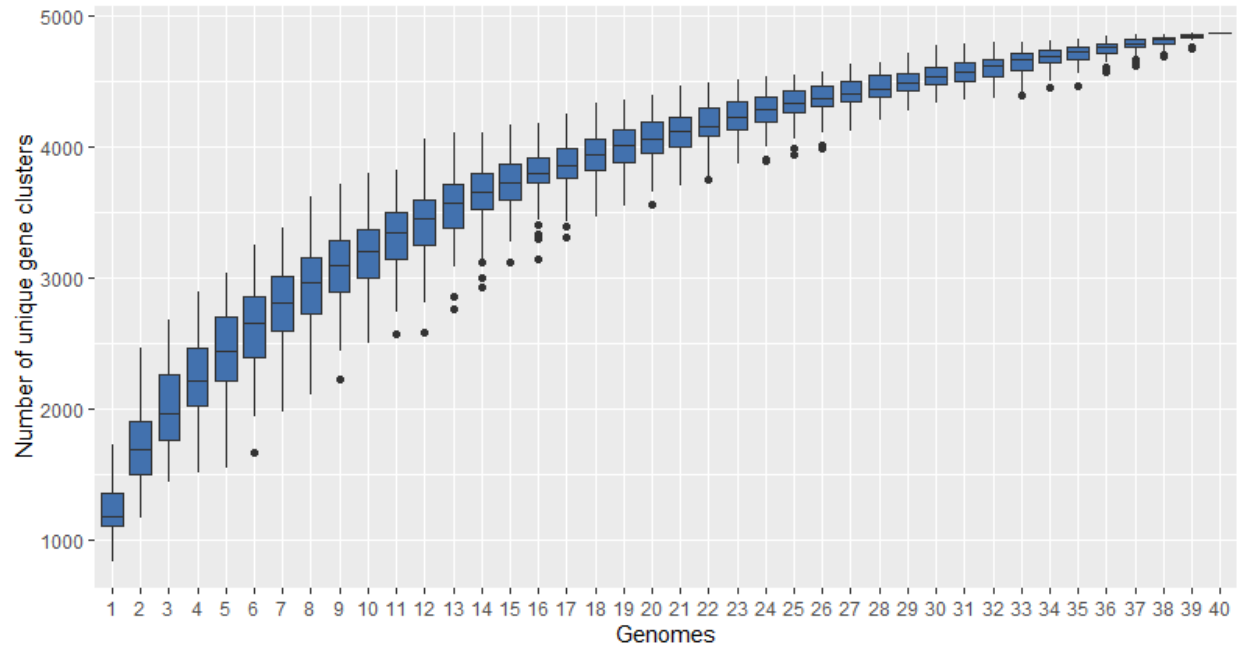

**Fig. S1** Rarefaction curve of the pangenome of *Gardnerella* spp..



**Table S1** Bacterial isolates and whole-genome sequences used for pangenome analysis and carbon source utilization profiling assay.

| Isolate   | cpn60 subgroup | Species               | Included in pangenome and COG analyses? | Included in Biolog assay? | BioProject accession number |
|-----------|----------------|-----------------------|-----------------------------------------|---------------------------|-----------------------------|
| NR020     | A              | <i>G. swidsinskii</i> | Yes                                     | Yes                       | PRJNA394757                 |
| NR015     | A              | Unknown               | Yes                                     | Yes                       | PRJNA394757                 |
| NR016     | A              | <i>G. swidsinskii</i> | Yes                                     | Yes                       | PRJNA394757                 |
| GH005     | A              | <i>G. leopoldii</i>   | Yes                                     | Yes                       | PRJNA394757                 |
| NR020     | A              | <i>G. swidsinskii</i> | Yes                                     | Yes                       | PRJNA394757                 |
| NR021     | A              | <i>G. swidsinskii</i> | Yes                                     | Yes                       | PRJNA394757                 |
| NR017     | A              | <i>G. leopoldii</i>   | Yes                                     | Yes                       | PRJNA394757                 |
| NR019     | A              | <i>G. leopoldii</i>   | Yes                                     | Yes                       | PRJNA394757                 |
| NR010     | A              | <i>G. leopoldii</i>   | Yes                                     | Yes                       | PRJNA310104                 |
| N72       | A              | <i>G. swidsinskii</i> | Yes                                     | Yes                       | PRJNA310104                 |
| VN003     | A              | <i>G. leopoldii</i>   | Yes                                     | Yes                       | PRJNA394757                 |
| WP021     | A              | <i>G. swidsinskii</i> | Yes                                     | Yes                       | PRJNA394757                 |
| WP022     | A              | <i>G. swidsinskii</i> | Yes                                     | Yes                       | PRJNA394757                 |
| N170      | B              | Genome species 3      | Yes                                     | Yes                       | PRJNA394757                 |
| N144      | B              | Genome species 3      | Yes                                     | Yes                       | PRJNA310104                 |
| N153      | B              | Genome species 3      | Yes                                     | No                        | PRJNA265102                 |
| W11       | B              | Genome species 3      | Yes                                     | Yes                       | PRJNA265103                 |
| NR026     | B              | Genome species 3      | Yes                                     | No                        | PRJNA394757                 |
| VN002     | B              | <i>G. piovii</i>      | Yes                                     | Yes                       | PRJNA394757                 |
| N101      | B              | Genome species 3      | Yes                                     | Yes                       | PRJNA265097                 |
| N95       | B              | Genome species 3      | Yes                                     | Yes                       | PRJNA265092                 |
| GH019     | B              | <i>G. piovii</i>      | Yes                                     | Yes                       | PRJNA394757                 |
| GH020     | B              | <i>G. piovii</i>      | Yes                                     | Yes                       | PRJNA394757                 |
| GH022     | B              | <i>G. piovii</i>      | Yes                                     | Yes                       | PRJNA394757                 |
| ATCC14018 | C              | <i>G. vaginalis</i>   | No                                      | Yes                       | PRJNA524873                 |
| ATCC14019 | C              | <i>G. vaginalis</i>   | Yes                                     | No                        | PRJNA55487                  |
| N165      | C              | <i>G. vaginalis</i>   | Yes                                     | Yes                       | PRJNA310104                 |
| NR037     | C              | <i>G. vaginalis</i>   | Yes                                     | No                        | PRJNA394757                 |
| NR038     | C              | <i>G. vaginalis</i>   | Yes                                     | Yes                       | PRJNA394757                 |
| NR039     | C              | <i>G. vaginalis</i>   | Yes                                     | Yes                       | PRJNA394757                 |
| GH015     | C              | <i>G. vaginalis</i>   | Yes                                     | Yes                       | PRJNA310104                 |
| GH021     | C              | <i>G. vaginalis</i>   | Yes                                     | Yes                       | PRJNA394757                 |
| NR001     | C              | <i>G. vaginalis</i>   | Yes                                     | Yes                       | PRJNA394757                 |
| WP023     | C              | <i>G. vaginalis</i>   | Yes                                     | Yes                       | PRJNA394757                 |
| NR003     | D              | Genome species 8      | Yes                                     | Yes                       | PRJNA394757                 |
| WP012     | D              | Genome species 9      | Yes                                     | Yes                       | PRJNA394757                 |
| N160      | D              | Genome species 10     | Yes                                     | Yes                       | PRJNA310104                 |
| NR047     | D              | Unknown               | Yes                                     | Yes                       | PRJNA394757                 |
| NR002     | D              | Genome species 8      | Yes                                     | Yes                       | PRJNA394757                 |
| NR043     | D              | Genome species 10     | Yes                                     | Yes                       | PRJNA394757                 |
| NR044     | D              | Genome species 10     | Yes                                     | Yes                       | PRJNA394757                 |
